# Supplementary material
Source: PubMed Central journal article supplement (PMC5177024)
Supplement: NIHMS836238-supplement-Table_S1.pdf [file NIHMS836238-supplement-Table_S1.pdf]

Table S1

| Small Molecule | Class of Targets           | Target Developed Against     | IC20 or the highest dose tested in PEO1 ( $\mu\text{M}$ ) | IC20 or the highest dose tested in OVCAR3 ( $\mu\text{M}$ ) |
|----------------|----------------------------|------------------------------|-----------------------------------------------------------|-------------------------------------------------------------|
| IOX2           | 2OG                        | PHD2                         | 0.0251                                                    | 20                                                          |
| SGC-CBP30      | Bromodomains               | CREBBP, EP300                | 1                                                         | 7.079                                                       |
| I-CBP112       | Bromodomains               | CREBBP, EP300                | 20                                                        | 20                                                          |
| JQ1            | Bromodomains               | BRD2, BRD3, BRD4, BRDT (BET) | 0.1995                                                    | 0.05                                                        |
| Bromosporine   | Bromodomains               | pan-Bromodomain              | 1.2589                                                    | 0.794                                                       |
| GSK2801        | Bromodomains               | BAZ2A, BAZ2B                 | 7.9433                                                    | 7.943                                                       |
| PFI-1          | Bromodomains               | BRD2, BRD3, BRD4, BRDT (BET) | 20                                                        | 2.512                                                       |
| PFI-3          | Bromodomains               | SMARCA, PB1                  | 20                                                        | 20                                                          |
| C646           | Histone Acetyltransferase  | p300                         | 0.7943                                                    | 1                                                           |
| LAQ824         | Histone Deacetylase        | HDAC                         | 0.001                                                     | 0.001                                                       |
| CI-994         | Histone Deacetylase        | HDAC1                        | 0.3162                                                    | 6.31                                                        |
| SGC0946        | Histone Methyltransferase  | DOT1L                        | 19.9526                                                   | 19.953                                                      |
| LLY-507        | Histone Methyltransferase  | SMYD2                        | 1.9953                                                    | 1.585                                                       |
| UNC1999        | Histone Methyltransferase  | EZH2                         | 3.1623                                                    | 1.585                                                       |
| UNC0642        | Histone Methyltransferase  | G9a, GLP                     | 12.5893                                                   | 8.913                                                       |
| GSK343         | Histone Methyltransferase  | EZH2                         | 5.0119                                                    | 3.981                                                       |
| UNC0638        | Histone Methyltransferase  | G9a, GLP                     | 14.1254                                                   | 12.589                                                      |
| PFI-2          | Histone Methyltransferase  | SETD7                        | 20                                                        | 20                                                          |
| GSK J4         | Histone Methyltransferase  | JMJD3, UTX                   | 1.5849                                                    | 0.562                                                       |
| A-366          | Histone Methyltransferase  | G9a, GLP                     | 20                                                        | 20                                                          |
| GSK-LSD1       | Histone Lysine Demethylase | LSD1                         | 20                                                        | 20                                                          |
| IOX1           | Histone Lysine Demethylase | pan-2-OG                     | 12.5893                                                   | 15.849                                                      |
| UNC1215        | Methyl Lysine Binder       | L3MBTL3                      | 19.9526                                                   | 20                                                          |
| Olaparib       | PARP                       | PARP1                        | 1.7783                                                    | 20                                                          |
