# Supplementary material
Source: PubMed Central journal article supplement (PMC5177024)
Supplement: NIHMS836238-supplement-Table_S2.pdf [file NIHMS836238-supplement-Table_S2.pdf]

Table S2

| Category      | Term                                                                | Enrichment | Sensitivity | p-value    | FDR        | pos | neg | genes                                                                                                                                                                                                            |
|---------------|---------------------------------------------------------------------|------------|-------------|------------|------------|-----|-----|------------------------------------------------------------------------------------------------------------------------------------------------------------------------------------------------------------------|
| GOTERM_BP_FAT | GO:0045785: positive regulation of cell adhesion                    | 14.4       | 8/60 (13%)  | 1.18E-06   | 1.92E-05   | 4   | 4   | CCDC80 (-7.90), CITED2 (8.10), ECM2 (-37.90), FGF1 (-7.70), SAA1 (18.90), SAA2 (21.30), SRC (-4.80), TNF (4.80)                                                                                                  |
| GOTERM_BP_FAT | GO:0030155: regulation of cell adhesion                             | 7.1        | 9/137 (6%)  | 3.70E-05   | 0.00059904 | 5   | 4   | CCDC80 (-7.90), CITED2 (8.10), ECM2 (-37.90), FGF1 (-7.70), SAA1 (18.90), SAA2 (21.30), SERPIN1 (7.60), SRC (-4.80), TNF (4.80)                                                                                  |
| GOTERM_BP_FAT | GO:006334: nucleosome assembly                                      | 9.0        | 7/84 (8%)   | 1.19E-04   | 0.00192731 | 4   | 3   | HIST1H2AB (-10.60), HIST1H2AC (14.20), HIST1H2AJ (-4.70), HIST1H2AL (-27.90), HIST1H2BK (4.20), HIST2H2BE (12.20), HIST2H4A (5.70)                                                                               |
| GOTERM_BP_FAT | GO:0031497: chromatin assembly                                      | 8.7        | 7/87 (8%)   | 1.45E-04   | 0.00234099 | 4   | 3   | HIST1H2AB (-10.60), HIST1H2AC (14.20), HIST1H2AJ (-4.70), HIST1H2AL (-27.90), HIST1H2BK (4.20), HIST2H2BE (12.20), HIST2H4A (5.70)                                                                               |
| GOTERM_BP_FAT | GO:0065004: protein-DNA complex assembly                            | 8.3        | 7/91 (7%)   | 1.85E-04   | 0.00299848 | 4   | 3   | HIST1H2AB (-10.60), HIST1H2AC (14.20), HIST1H2AJ (-4.70), HIST1H2AL (-27.90), HIST1H2BK (4.20), HIST2H2BE (12.20), HIST2H4A (5.70)                                                                               |
| GOTERM_BP_FAT | GO:0034728: nucleosome organization                                 | 8.1        | 7/93 (7%)   | 2.09E-04   | 0.00337764 | 4   | 3   | HIST1H2AB (-10.60), HIST1H2AC (14.20), HIST1H2AJ (-4.70), HIST1H2AL (-27.90), HIST1H2BK (4.20), HIST2H2BE (12.20), HIST2H4A (5.70)                                                                               |
| GOTERM_BP_FAT | GO:0014912: negative regulation of smooth muscle cell migration     | 81.2       | 3/4 (75%)   | 4.94E-04   | 0.00797181 | 0   | 3   | IGFBP3 (-4.70), IGFBP5 (-10.00), TRIB1 (-102.70)                                                                                                                                                                 |
| GOTERM_BP_FAT | GO:006323: DNA packaging                                            | 6.5        | 7/117 (5%)  | 7.17E-04   | 0.01155096 | 4   | 3   | HIST1H2AB (-10.60), HIST1H2AC (14.20), HIST1H2AJ (-4.70), HIST1H2AL (-27.90), HIST1H2BK (4.20), HIST2H2BE (12.20), HIST2H4A (5.70)                                                                               |
| GOTERM_BP_FAT | GO:006333: chromatin assembly or disassembly                        | 6.0        | 7/127 (5%)  | 0.00110061 | 0.0176761  | 4   | 3   | HIST1H2AB (-10.60), HIST1H2AC (14.20), HIST1H2AJ (-4.70), HIST1H2AL (-27.90), HIST1H2BK (4.20), HIST2H2BE (12.20), HIST2H4A (5.70)                                                                               |
| GOTERM_BP_FAT | GO:006928: cell motion                                              | 3.0        | 13/475 (2%) | 0.00138108 | 0.02213336 | 9   | 4   | CTGF (17.30), DNAH1 (34.10), DOCK2 (-40.00), EPHB1 (10.40), ETV4 (-5.20), KAL1 (4.60), MYLIP (4.20), S100A2 (-6.90), SAA1 (18.90), SAA2 (21.30), SRC (-4.80), TNF (4.80), UNC5B (10.00)                          |
| GOTERM_BP_FAT | GO:0048247: lymphocyte chemotaxis                                   | 46.4       | 3/7 (42%)   | 0.00169837 | 0.02715302 | 2   | 1   | DOCK2 (-40.00), SAA1 (18.90), SAA2 (21.30)                                                                                                                                                                       |
| GOTERM_BP_FAT | GO:0009617: response to bacterium                                   | 4.5        | 8/193 (4%)  | 0.00199406 | 0.03180912 | 5   | 3   | BDKRB1 (-7.00), DEFB4A (-55.60), FOS (10.80), HIST1H2BK (4.20), HIST2H2BE (12.20), PLCG2 (5.50), TNF (4.80), TRIB1 (-102.70)                                                                                     |
| GOTERM_BP_FAT | GO:0006952: defense response                                        | 2.5        | 14/615 (2%) | 0.00417596 | 0.06552569 | 10  | 4   | ADORA2B (-5.00), ALOX5 (10.30), ANKRD1 (9.70), BDKRB1 (-7.00), CLU (15.50), DEFB4A (-55.60), FOS (10.80), GAL (-4.20), HIST1H2BK (4.20), HIST2H2BE (12.20), SAA1 (18.90), SAA2 (21.30), SAA4 (34.70), TNF (4.80) |
| GOTERM_BP_FAT | GO:0014910: regulation of smooth muscle cell migration              | 27.1       | 3/12 (25%)  | 0.00517995 | 0.08066729 | 0   | 3   | IGFBP3 (-4.70), IGFBP5 (-10.00), TRIB1 (-102.70)                                                                                                                                                                 |
| GOTERM_BP_FAT | GO:0048662: negative regulation of smooth muscle cell proliferation | 23.2       | 3/14 (21%)  | 0.00705705 | 0.10836102 | 0   | 3   | IGFBP3 (-4.70), IGFBP5 (-10.00), TRIB1 (-102.70)                                                                                                                                                                 |
| GOTERM_BP_FAT | GO:0048660: regulation of smooth muscle cell proliferation          | 9.4        | 4/46 (8%)   | 0.00856435 | 0.13003019 | 1   | 3   | IGFBP3 (-4.70), IGFBP5 (-10.00), TNF (4.80), TRIB1 (-102.70)                                                                                                                                                     |
| GOTERM_BP_FAT | GO:0007160: cell-matrix adhesion                                    | 6.1        | 5/89 (5%)   | 0.00902037 | 0.13648806 | 2   | 3   | CTGF (17.30), ECM2 (-37.90), ITGB8 (6.50), ITGBL1 (-4.20), NID2 (-9.60)                                                                                                                                          |
| GOTERM_BP_FAT | GO:0009611: response to wounding                                    | 2.5        | 12/530 (2%) | 0.00942085 | 0.1421223  | 9   | 3   | ALOX5 (10.30), BDKRB1 (-7.00), CLU (15.50), CTGF (17.30), FOS (10.80), GAL (-4.20), SAA1 (18.90), SAA2 (21.30), SAA4 (34.70), SDC1 (-5.50), TFPI2 (4.70), TNF (4.80)                                             |
| GOTERM_BP_FAT | GO:0006954: inflammatory response                                   | 3.0        | 9/325 (2%)  | 0.01009226 | 0.1514907  | 7   | 2   | ALOX5 (10.30), BDKRB1 (-7.00), CLU (15.50), FOS (10.80), GAL (-4.20), SAA1 (18.90), SAA2 (21.30), SAA4 (34.70), TNF (4.80)                                                                                       |
| GOTERM_BP_FAT | GO:0007155: cell adhesion                                           | 2.2        | 14/700 (2%) | 0.01185628 | 0.17564956 | 9   | 5   | CLSTN2 (201.80), CTGF (17.30), ECM2 (-37.90), ISLR (-89.90), ITGB8 (6.50), ITGBL1 (-4.20), KAL1 (4.60), NID2 (-9.60), NLGN1 (31.50), PCDH17 (71.10), PCDH19 (4.30), PCDHGA7 (32.50), SRC (-4.80), TNF (4.80)     |
| GOTERM_BP_FAT | GO:0022610: biological adhesion                                     | 2.2        | 14/701 (2%) | 0.01198764 | 0.17742258 | 9   | 5   | CLSTN2 (201.80), CTGF (17.30), ECM2 (-37.90), ISLR (-89.90), ITGB8 (6.50), ITGBL1 (-4.20), KAL1 (4.60), NID2 (-9.60), NLGN1 (31.50), PCDH17 (71.10), PCDH19 (4.30), PCDHGA7 (32.50), SRC (-4.80), TNF (4.80)     |
| GOTERM_BP_FAT | GO:0031589: cell-substrate adhesion                                 | 5.5        | 5/98 (5%)   | 0.0125352  | 0.18477447 | 2   | 3   | CTGF (17.30), ECM2 (-37.90), ITGB8 (6.50), ITGBL1 (-4.20), NID2 (-9.60)                                                                                                                                          |
| GOTERM_BP_FAT | GO:0016337: cell-cell adhesion                                      | 3.1        | 8/276 (2%)  | 0.01357538 | 0.1985711  | 7   | 1   | CLSTN2 (201.80), CTGF (17.30), NLGN1 (31.50), PCDH17 (71.10), PCDH19 (4.30), PCDHGA7 (32.50), SRC (-4.80), TNF (4.80)                                                                                            |
